# Supplementary material for: Rem2 stabilizes intrinsic excitability and spontaneous firing in visual circuits
Source: eLife journal article supplement (doi:10.7554/elife.33092), 2018-05-29
Supplement: figures [file elife-33092-figures-v2.pdf]

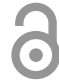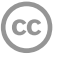

---

## Figures and figure supplements

Rem2 stabilizes intrinsic excitability and spontaneous firing in visual circuits

**Anna R Moore et al**

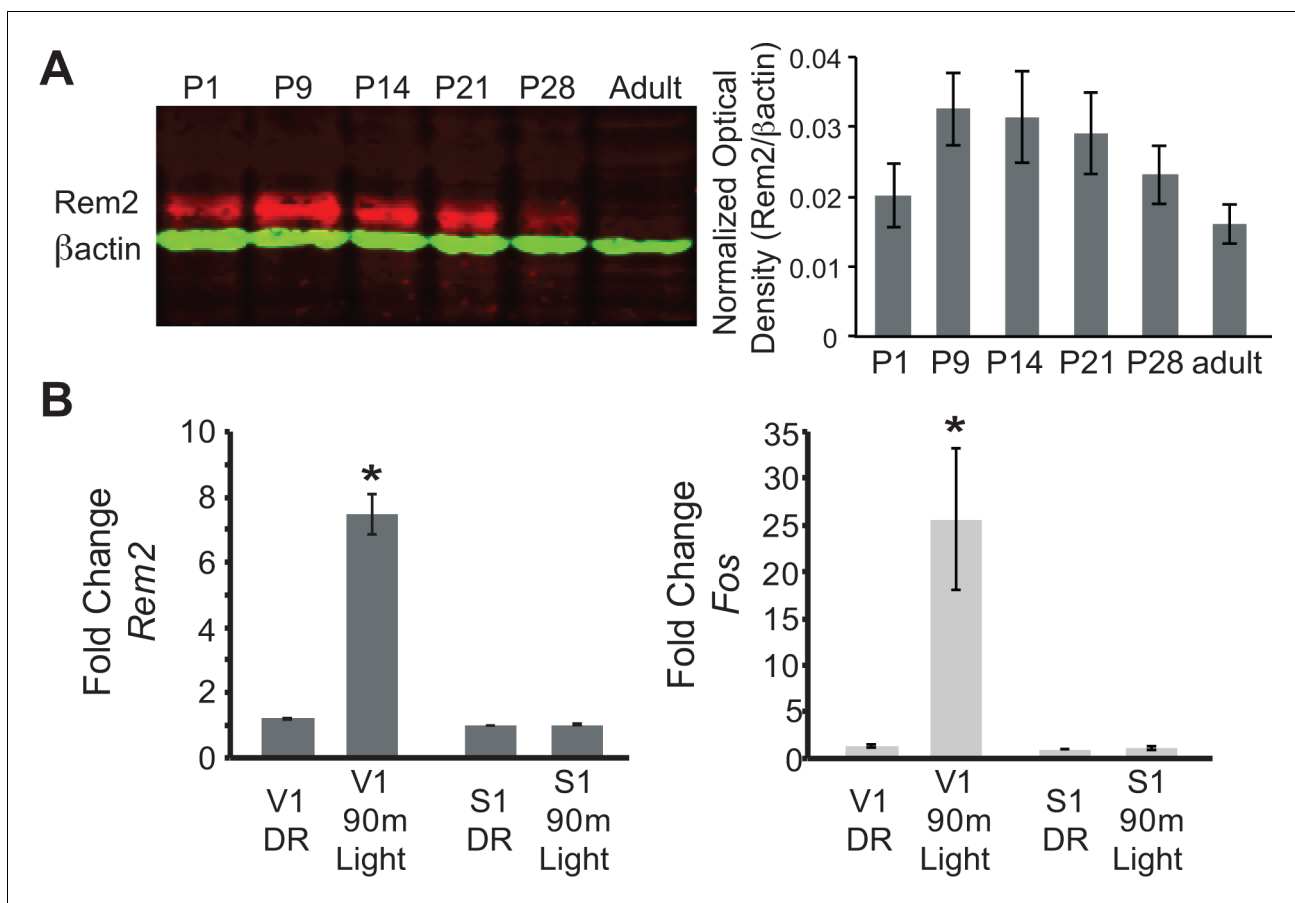

**Figure 1.** Rem2 expression is developmentally regulated and activity-dependent. (A) (left) Western Blot of cortical lysate from rat brains at different developmental ages detected using anti-Rem2 (1:500); anti- $\beta$ actin (1:5000) was used as a loading control. (right) Quantification of relative Rem2 intensity at different developmental ages normalized to anti- $\beta$ actin. Molecular Weight of REM2: ~50 kDa. Molecular weight of ACTB: 42 kDa. (B) Fold change in *Rem2* (left) or *Fos* mRNA expression (right) in isolated primary visual cortex (V1) or somatosensory cortex (S1) from P28 mice raised in the dark (DR, from P9-P28) or raised in the dark (P9-P28) and exposed to light for 90 m (90 m Light). N = 3 biological replicates of 4 mice in each experiment. mRNA levels were normalized to *Actb* levels and then to S1 DR condition and presented as mean  $\pm$  SEM. \* $p < 0.05$  from V1 DR by one-way ANOVA followed by a Dunnett's post hoc test.

DOI: <https://doi.org/10.7554/eLife.33092.003>

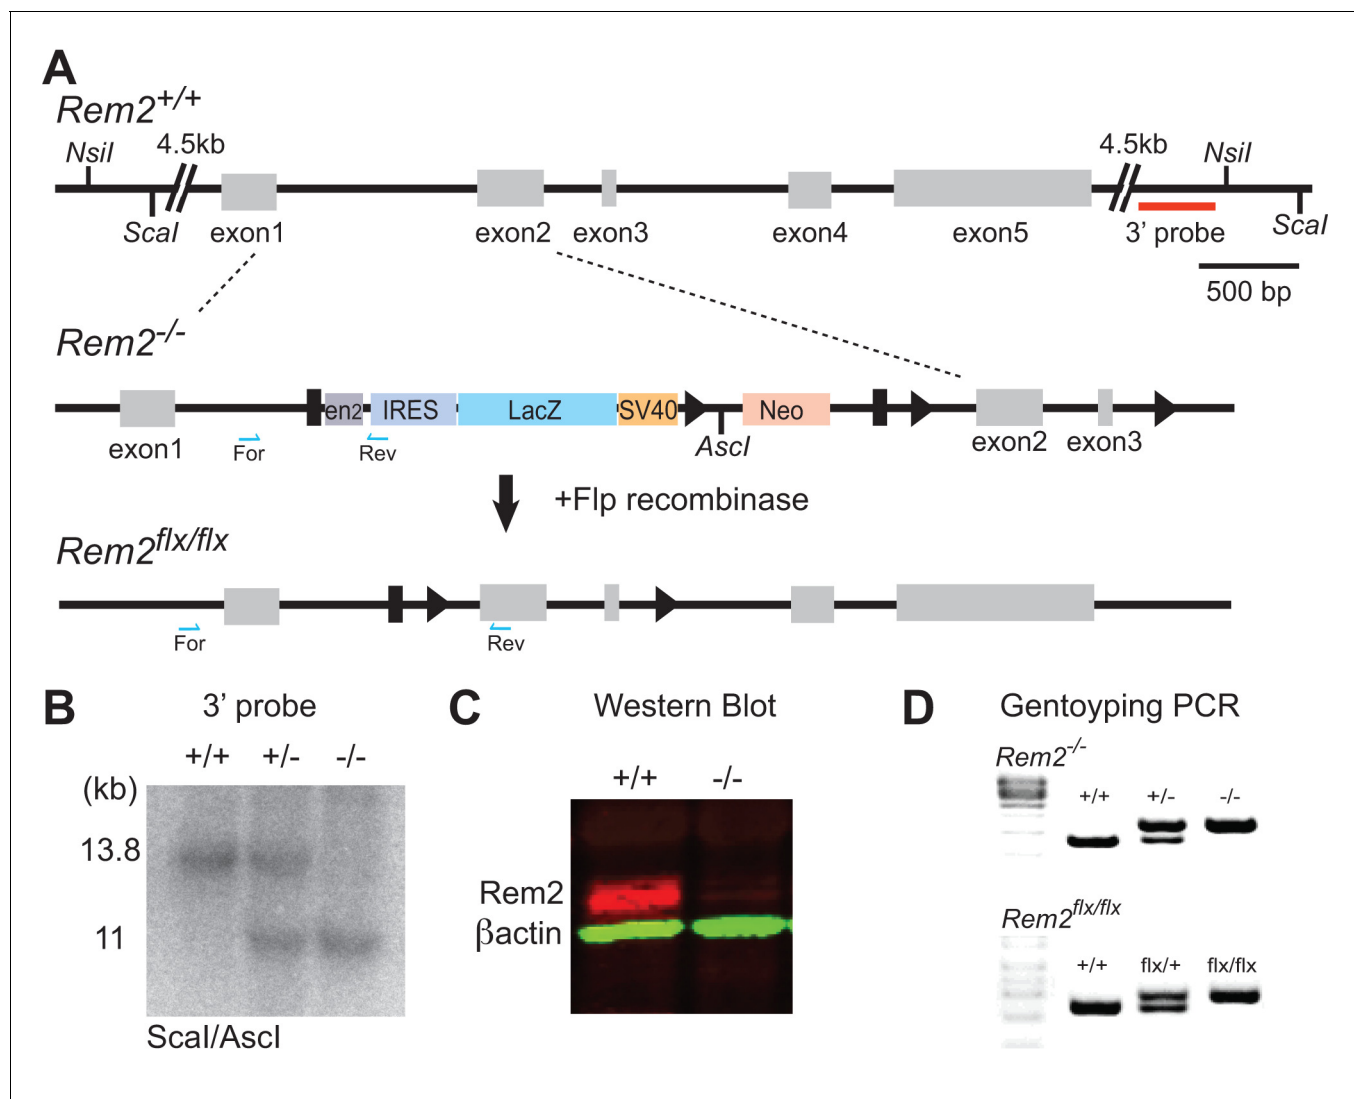

**Figure 2.** Generation of a *Rem2* knockout mouse. (A) The *Rem2* locus (top, *Rem2*<sup>+/+</sup>) with exons 1–5 depicted as gray boxes. Homologous recombination was used to insert a 7.5 kb cassette containing a mouse *En2* splice acceptor sequences (EN2), IRES, a LacZ gene, a SV40 polyadenylation, and a Neo gene flanked by FRT sites (black rectangles) and LoxP sites flanking exons 2 and 3 (indicated by black triangles). Insertion of this cassette yielded a *Rem2* null allele (*Rem2*<sup>-/-</sup>). Following germline transmission of the insert allele, the mice were crossed to a mouse expressing Flp recombinase in the germline, which produced a floxed *Rem2* allele (termed *Rem2*<sup>flx/flx</sup>, bottom). Blue half arrows indicate PCR forward and reverse primer locations. Scale bar, 500 bp. (B) Southern blot analysis of *Scal/Ascl*-digested genomic DNA from mice that are *Rem2* wildtype (+/+), heterozygous (+/-) or homozygous (-/-) using the 3' probe (red line, top A). Fragments of the predicted size (11 kb) indicate correct targeting. (C) Western blot analysis of *Rem2*<sup>+/+</sup> and *Rem2*<sup>-/-</sup> mice confirming the loss of Rem2 expression. Molecular Weight of REM2: 37 kDa. Molecular weight of ACTB: 42 kDa. (D) Genotyping PCR products of genomic DNA isolated from tails of mice that were (top) wildtype (*Rem2*<sup>+/+</sup>), heterozygous (*Rem2*<sup>+/-</sup>) or homozygous (*Rem2*<sup>-/-</sup>) or (bottom) wildtype (*Rem2*<sup>+/+</sup>), heterozygous (*Rem2*<sup>flx/+</sup>) or homozygous (*Rem2*<sup>flx/flx</sup>). See Materials and methods for genotyping details.

DOI: <https://doi.org/10.7554/eLife.33092.004>

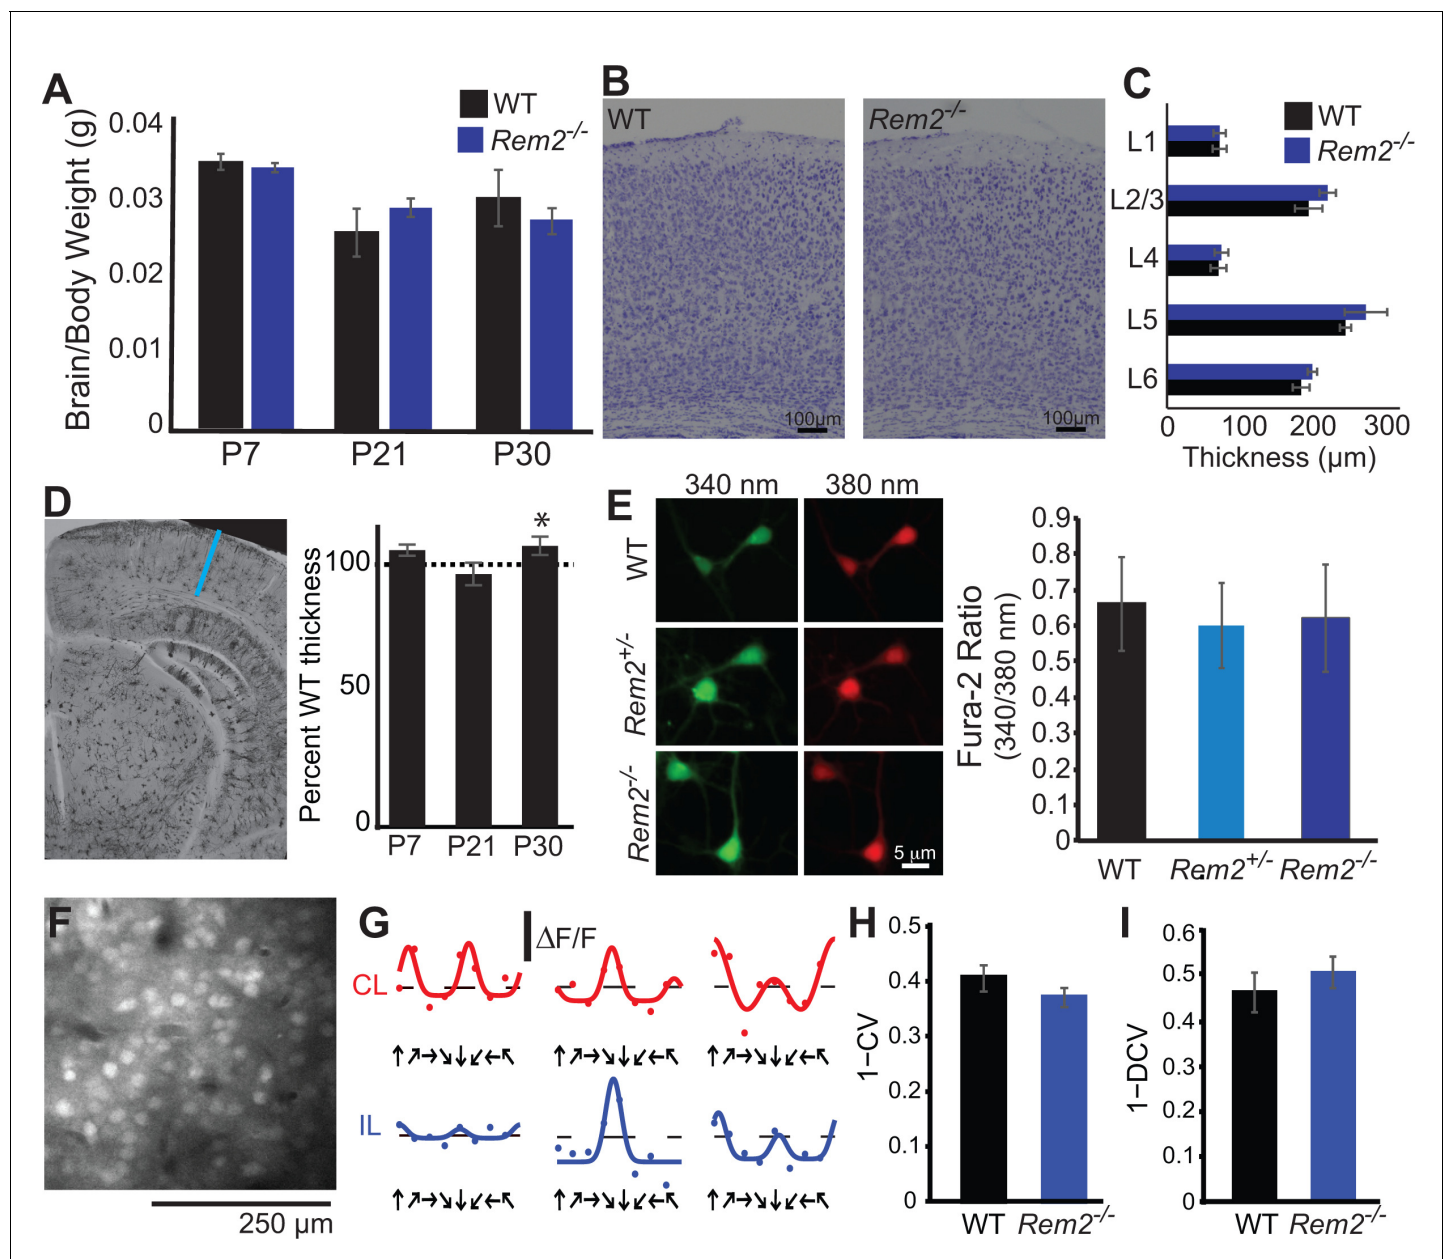

**Figure 2—figure supplement 1.** *Rem2*<sup>-/-</sup> mice display no gross anatomical or function cortical abnormalities. (A) Brain/body weight ratio of P7, P21 and P30 WT and *Rem2*<sup>-/-</sup> mice. (B) Representative images of WT and *Rem2*<sup>-/-</sup> Nissl stained brain slices from P16 mice (30 μm sections, scale bar 100 μm). (C) Cortical layer thickness measured in P16 WT and *Rem2*<sup>-/-</sup> mice (N = 3 animals per condition). (D) (Left) Representative image of visual cortex of P21 mouse brain stained with Golgi-Cox labeling. Blue line shows the distance of cortical thickness measured from the deep extent of L6 to the pial surface. (Right) Percent cortical thickness measured in P7 (N = 2 animals per condition), P21 (N = 3 animals per condition), and P30 mice (N = 4 animals per condition). Data is presented as percent thickness of *Rem2*<sup>-/-</sup> to WT cortical thickness. \*p < 0.05 by student's t-test. (E) (Left) Representative images of Fura-2 calcium acquired at 340 nm (green) and 380 nm (red) in WT, *Rem2*<sup>+/-</sup>, or *Rem2*<sup>-/-</sup> cultured neurons. (Right) The ratio of Fura-2 signal (340 nm/380 nm) measured in WT, *Rem2*<sup>+/-</sup>, or *Rem2*<sup>-/-</sup> cultured cortical neurons. (F) Representative imaging field of neurons in mouse binocular visual cortex loaded with the calcium indicator dye Oregon Green BAPTA-1AM. Scale bar, 250 μm. (G) Example responses of 3 cells to visual stimulation (represented as ΔF/F, black vertical bar) of the contralateral (C) eye (top; red lines) and ipsilateral (I) eye (bottom; blue lines) with drifting gratings moving in different directions (black arrows). (H) Orientation selectivity as assessed by circular variance (1-CV) for WT (n = 59 cells, N = 7 animals) and *Rem2*<sup>-/-</sup> mice (n = 82 cells; N = 5 animals). (I) Direction selectivity as assessed by circular variance in direction space (1-DCV) for WT and *Rem2*<sup>-/-</sup> mice. All data is presented as mean ± SEM.

DOI: <https://doi.org/10.7554/eLife.33092.005>

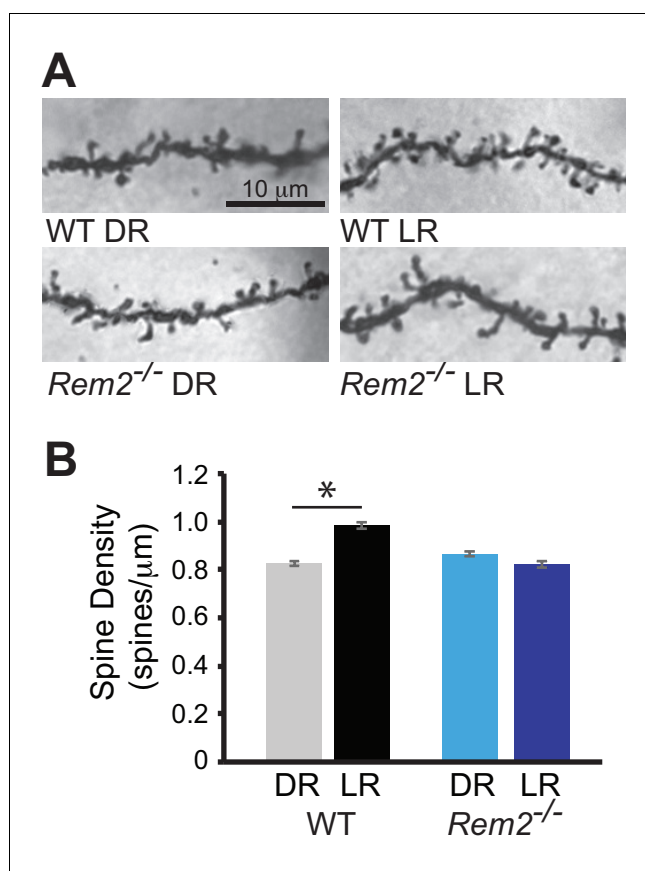

**Figure 2—figure supplement 2.**  $Rem2^{-/-}$  mice exhibit decreased spine density in vivo. (A) Representative images of Golgi-cox labeled dendritic spines. Images were taken from terminal branches off the apical tree 50–100  $\mu$ m from the cell soma of layer 2/3 pyramidal neurons located in primary visual cortex. Scale bar, 10  $\mu$ m. (B) Spine density measured in wildtype and  $Rem2^{-/-}$  mice dark reared from P9-P30 (WT DR, n = 36 neurons;  $Rem2^{-/-}$  DR n = 36 neurons) or under normal light rearing conditions (WT LR, n = 29 neurons;  $Rem2^{-/-}$  LR, n = 29 neurons). N = 4 animals for WT LR and  $Rem2^{-/-}$  LR and N = 5 animals for WT DR and  $Rem2^{-/-}$  DR experiments. Data is presented as mean  $\pm$  SEM. \*p < 0.05 compared to WT LR by two-way ANOVA followed by Tukey post hoc.

DOI: <https://doi.org/10.7554/eLife.33092.006>

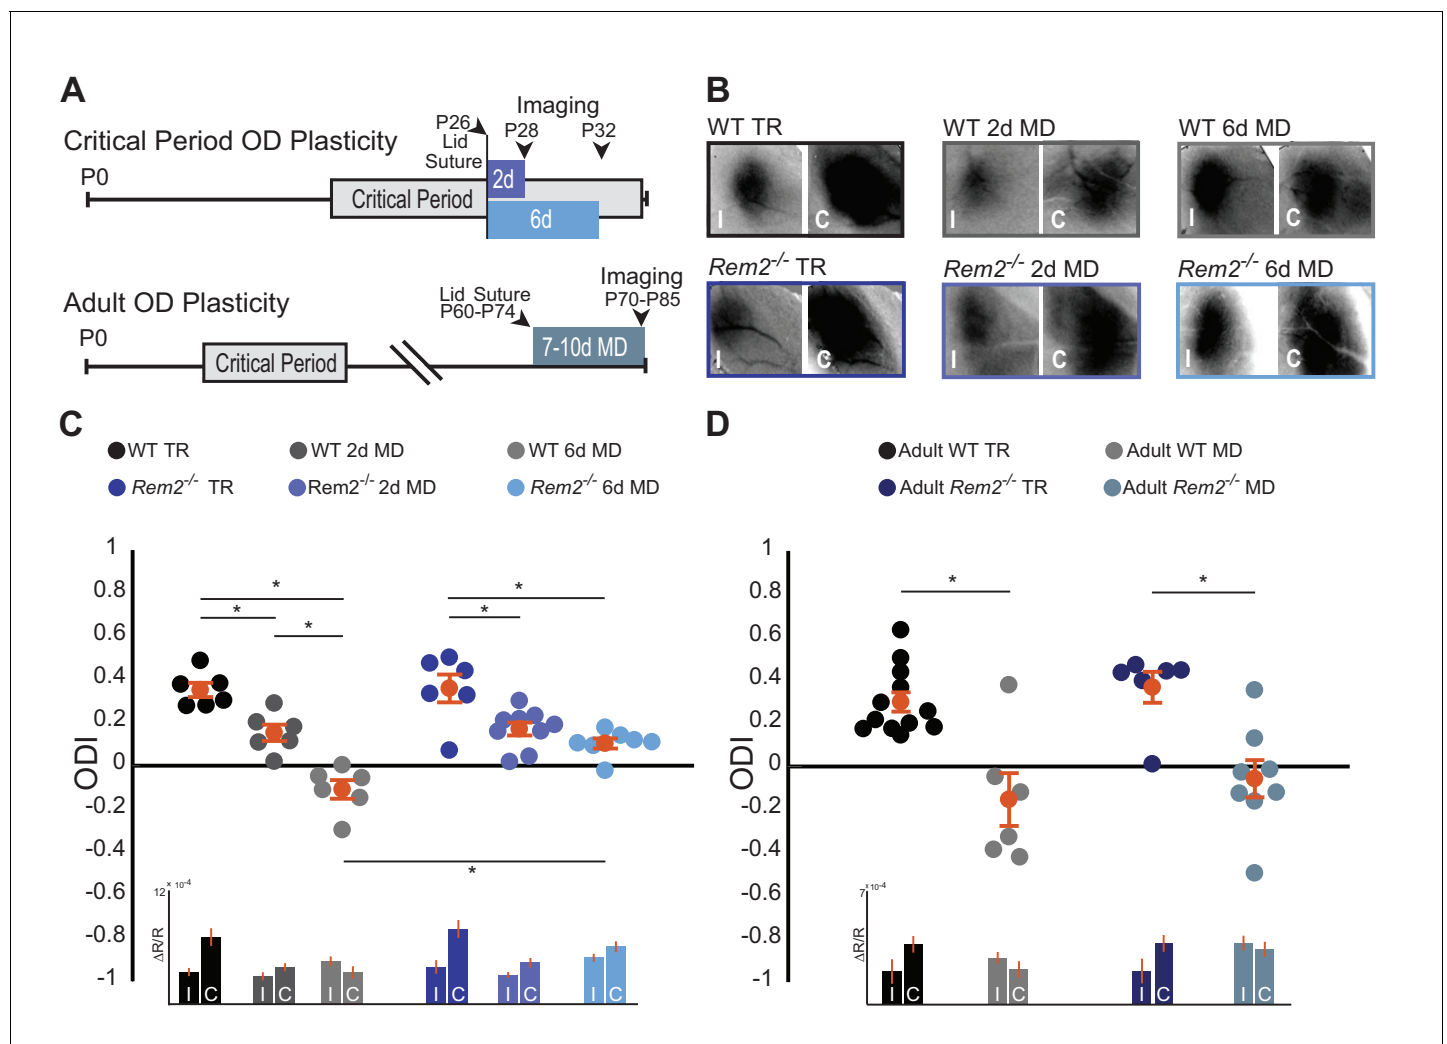

**Figure 3.** *Rem2* is required for late-phase critical period ocular dominance plasticity. **(A)** Representative experimental timeline for (top) critical period ocular dominance (OD) plasticity and (bottom) adult OD plasticity. **(B)** Example fields showing intrinsic signal imaging data from the ipsilateral (I) and contralateral (C) eyes in wildtype or *Rem2*<sup>-/-</sup> mice that were (left) typically reared (TR) or monocularly deprived (MD) for 2 days (middle) and 6 days (right). **(C)** Ocular dominance index (ODI) for WT TR (black, n = 6), WT 2d MD (dark gray, n = 6), WT 6d MD (light gray, n = 6), *Rem2*<sup>-/-</sup> TR (blue, n = 6), and *Rem2*<sup>-/-</sup> 2d MD (medium blue, n = 9), *Rem2*<sup>-/-</sup> 6d MD (light blue, n = 7). Mice are shown as circles for each animal. Orange circles with error bars represent the group averages. Inset at bottom: Changes in reflectance over baseline reflectance ( $\Delta R/R$ ) as measured by ISI driven ipsilateral (I) or contralateral (C) eye for wildtype and *Rem2*<sup>-/-</sup> mice that were either typically reared or monocularly deprived. **(D)** ODI for Adult WT TR (black, n = 12), Adult WT MD (gray, n = 6), Adult *Rem2*<sup>-/-</sup> TR (navy blue, n = 6), and Adult *Rem2*<sup>-/-</sup> MD (gray blue, n = 8). Inset:  $\Delta R/R$  for Adult WT and *Rem2*<sup>-/-</sup> TR and MD mice. Data is presented as mean  $\pm$  SEM. \* $p < 0.05$  by two-way ANOVA and Tukey post-hoc. Significance comparisons for  $\Delta R/R$  in C and D insets are listed in Table 1.

DOI: <https://doi.org/10.7554/eLife.33092.007>

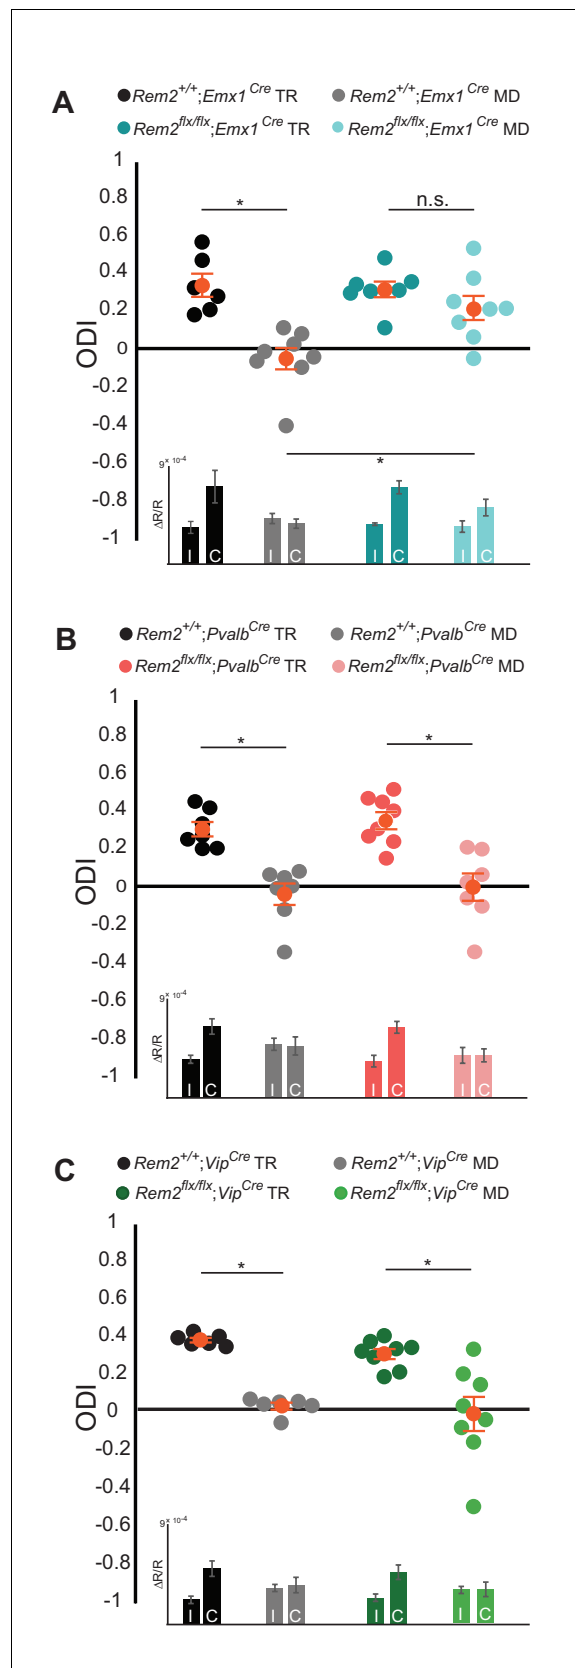

**Figure 4.** Rem2 is required in cortical excitatory neurons for ocular dominance plasticity. (A) Ocular dominance index (ODI) for  $Rem2^{+/+};Emx1^{Cre}$  typically reared (TR, black,  $n = 6$ ),  $Rem2^{+/+};Emx1^{Cre}$  monocularly deprived (MD, Figure 4 continued on next page

## Figure 4 continued

gray,  $n = 8$ ),  $Rem2^{-/-}; Emx1^{Cre}$  TR (dark teal,  $n = 7$ ) or  $Rem2^{-/-}; Emx1^{Cre}$  MD (light teal,  $n = 8$ ). Inset:  $\Delta R/R$  for  $Rem2^{+/+}; Emx1^{Cre}$  and  $Rem2^{-/-}; Emx1^{Cre}$  TR and MD mice. (B) ODI for  $Rem2^{+/+}; Pvalb^{Cre}$  TR (black,  $n = 7$ ),  $Rem2^{+/+}; Pvalb^{Cre}$  MD (gray,  $n = 7$ ),  $Rem2^{-/-}; Pvalb^{Cre}$  TR (magenta,  $n = 8$ ) or  $Rem2^{-/-}; Pvalb^{Cre}$  MD (light pink,  $n = 7$ ). Inset:  $\Delta R/R$  for  $Rem2^{+/+}; Pvalb^{Cre}$  and  $Rem2^{-/-}; Pvalb^{Cre}$  TR and MD mice. (C) ODI for  $Rem2^{+/+}; Vip^{Cre}$  TR (black,  $n = 6$ ),  $Rem2^{+/+}; Vip^{Cre}$  MD (gray,  $n = 6$ ),  $Rem2^{-/-}; Vip^{Cre}$  TR (green,  $n = 8$ ) or  $Rem2^{-/-}; Vip^{Cre}$  MD (light green,  $n = 8$ ). Inset:  $\Delta R/R$  for  $Rem2^{+/+}; Vip^{Cre}$  and  $Rem2^{-/-}; Vip^{Cre}$  TR and MD mice. Each animal is depicted as an individual circle. Orange circles with error bars represent the averages for each group  $\pm$  SEM. Data is presented as mean  $\pm$  SEM. \* $p < 0.05$  by two-way ANOVA with Tukey post-hoc. Significance comparisons for  $\Delta R/R$  in C and D insets are listed in **Table 1**.

DOI: <https://doi.org/10.7554/eLife.33092.009>



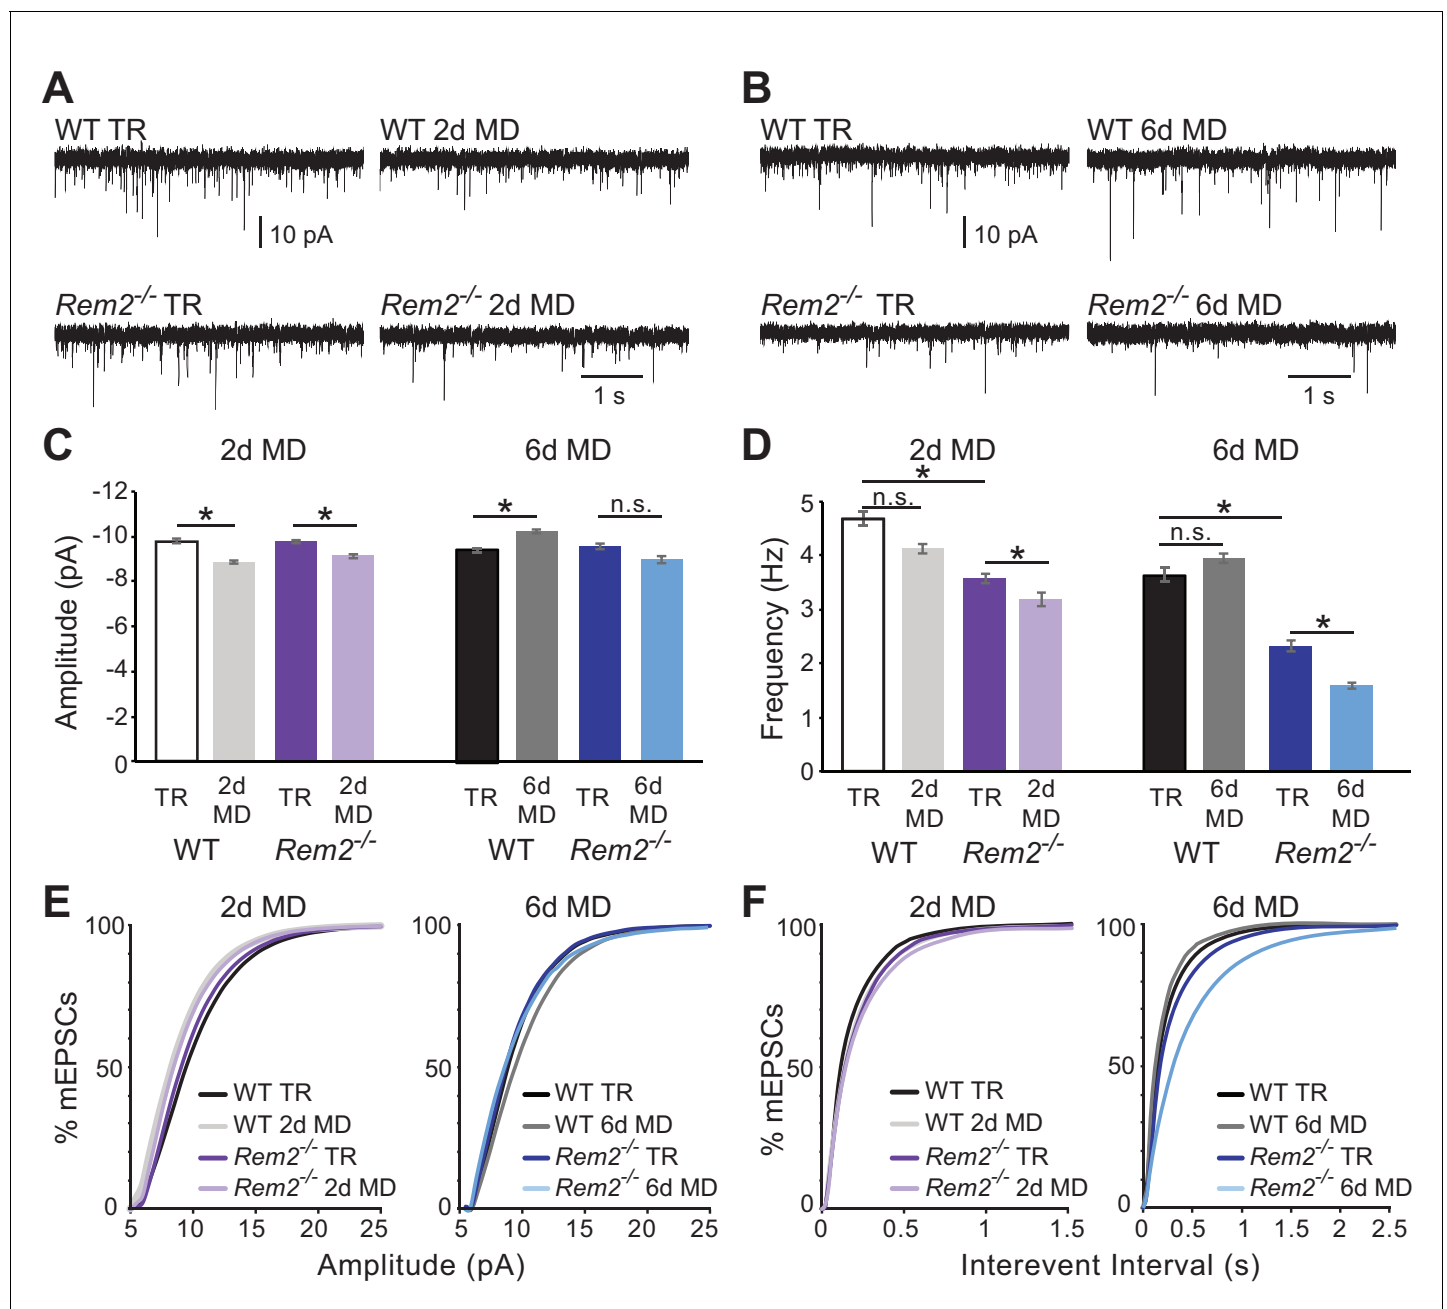

**Figure 5.** *Rem2* is required for postsynaptic strengthening following 6 days of monocular deprivation. (A) Representative whole-cell voltage clamp recordings of mEPSCs from layer 2/3 pyramidal neurons in binocular visual cortex (V1b) of wildtype typically reared mice at P28 (WT TR), wildtype mice undergoing 2 days of monocular deprivation (WT 2d MD), *Rem2*<sup>-/-</sup> typically reared mice at P28 (*Rem2*<sup>-/-</sup> TR), or *Rem2*<sup>-/-</sup> mice following 2 days of monocular deprivation (*Rem2*<sup>-/-</sup> 2d MD). (B) Representative voltage-clamp traces from layer 2/3 pyramidal neurons from V1b of wildtype typically reared mice at P32 (WT TR), wildtype mice undergoing 6 days of monocular deprivation from P26-P32 (WT 6d MD), *Rem2*<sup>-/-</sup> typically reared mice at P32 (*Rem2*<sup>-/-</sup> TR) or following 6 days of MD (*Rem2*<sup>-/-</sup> 6d MD). (C) Average mEPSC amplitude recorded from wildtype or *Rem2*<sup>-/-</sup> layer 2/3 pyramidal neurons with normal visual experience at (left) P28 (WT TR, white, n = 25; *Rem2*<sup>-/-</sup> TR, dark purple, n = 29), or following 2 days of monocular deprivation (WT 2d MD, light gray, n = 25; *Rem2*<sup>-/-</sup> 2d MD, light purple, n = 23) or (right) at P32 with normal visual experience (WT TR, black, n = 24; *Rem2*<sup>-/-</sup> TR, dark blue, n = 24) or following 6 days of monocular deprivation (WT 6d MD, gray, n = 25; *Rem2*<sup>-/-</sup> 6d MD, light blue, n = 25). N = 4 animals per experimental condition. (D) Average mEPSC frequency in wildtype and *Rem2*<sup>-/-</sup> mice undergoing 2 days (Left) or 6 days (Right) of monocular deprivation compared to typically reared age-matched controls. (E) Cumulative distribution plot of mEPSC amplitude or (F) Interevent Interval recorded in wildtype and *Rem2*<sup>-/-</sup> mice following 2 days (Left) or 6 days (Right) of monocular deprivation. Data is presented as mean ± SEM. \*p < 0.05, by two-way ANOVA and Tukey post-hoc for mEPSC frequency and amplitude mean data plots.

DOI: <https://doi.org/10.7554/eLife.33092.010>

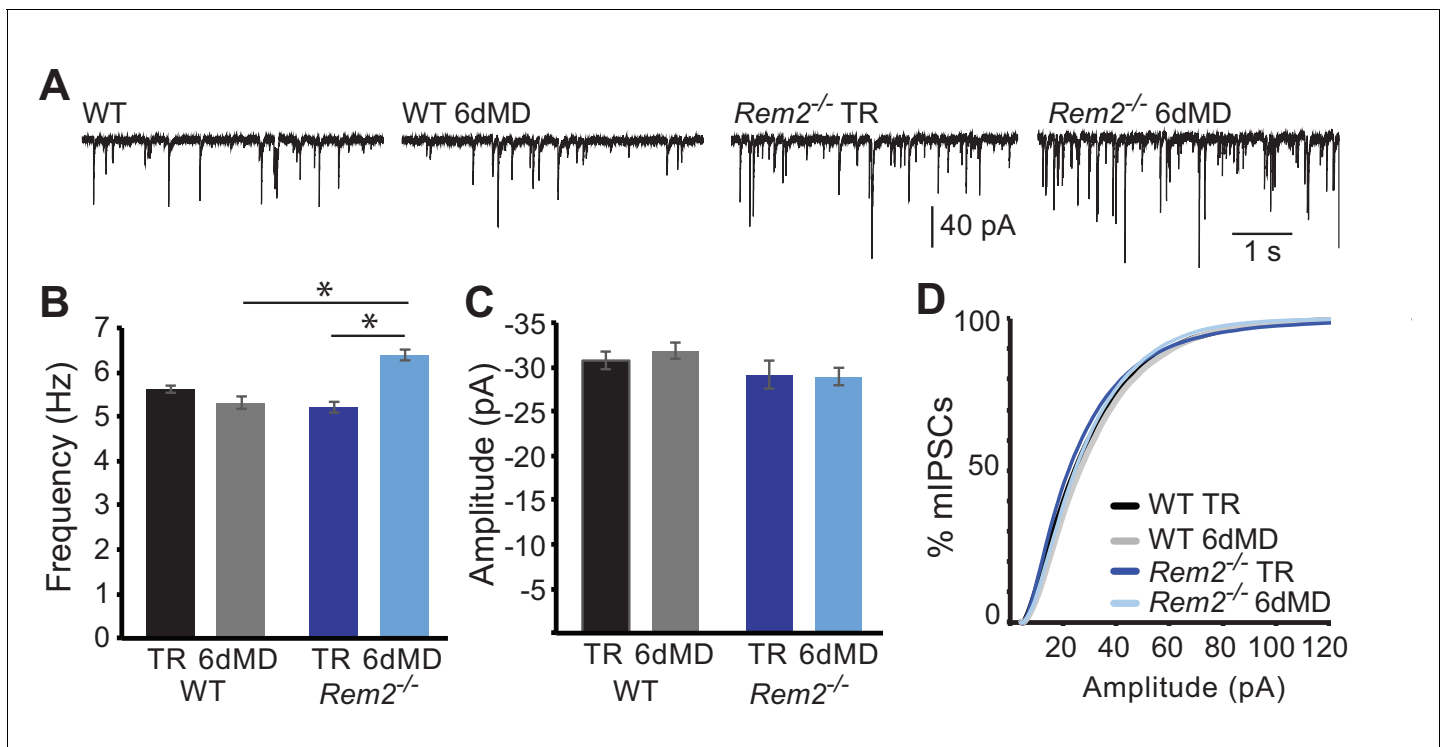

**Figure 6.** *Rem2*<sup>-/-</sup> does not alter inhibition in layer 2/3 pyramidal neurons. (A) Representative whole-cell recordings of mIPSCs from layer 2/3 pyramidal neurons in V1b in wildtype or *Rem2*<sup>-/-</sup> that were either typically reared (TR) until P32 or monocularly deprived (from P26-P32) for 6 days (6d MD). Quantification of average mIPSC frequency (B) and amplitude (C) in WT and *Rem2*<sup>-/-</sup> cells (WT TR n = 22, WT 6d MD n = 17, *Rem2*<sup>-/-</sup> TR n = 22, and *Rem2*<sup>-/-</sup> 6d MD n = 17). N = 3 animals per condition. (D) Cumulative distribution plot of mIPSC amplitudes in WT TR, WT 6d MD, *Rem2* TR, and *Rem2* MD. Data is presented as mean ± SEM. \*p < 0.05 by two-way ANOVA with Tukey post-hoc.

DOI: <https://doi.org/10.7554/eLife.33092.011>

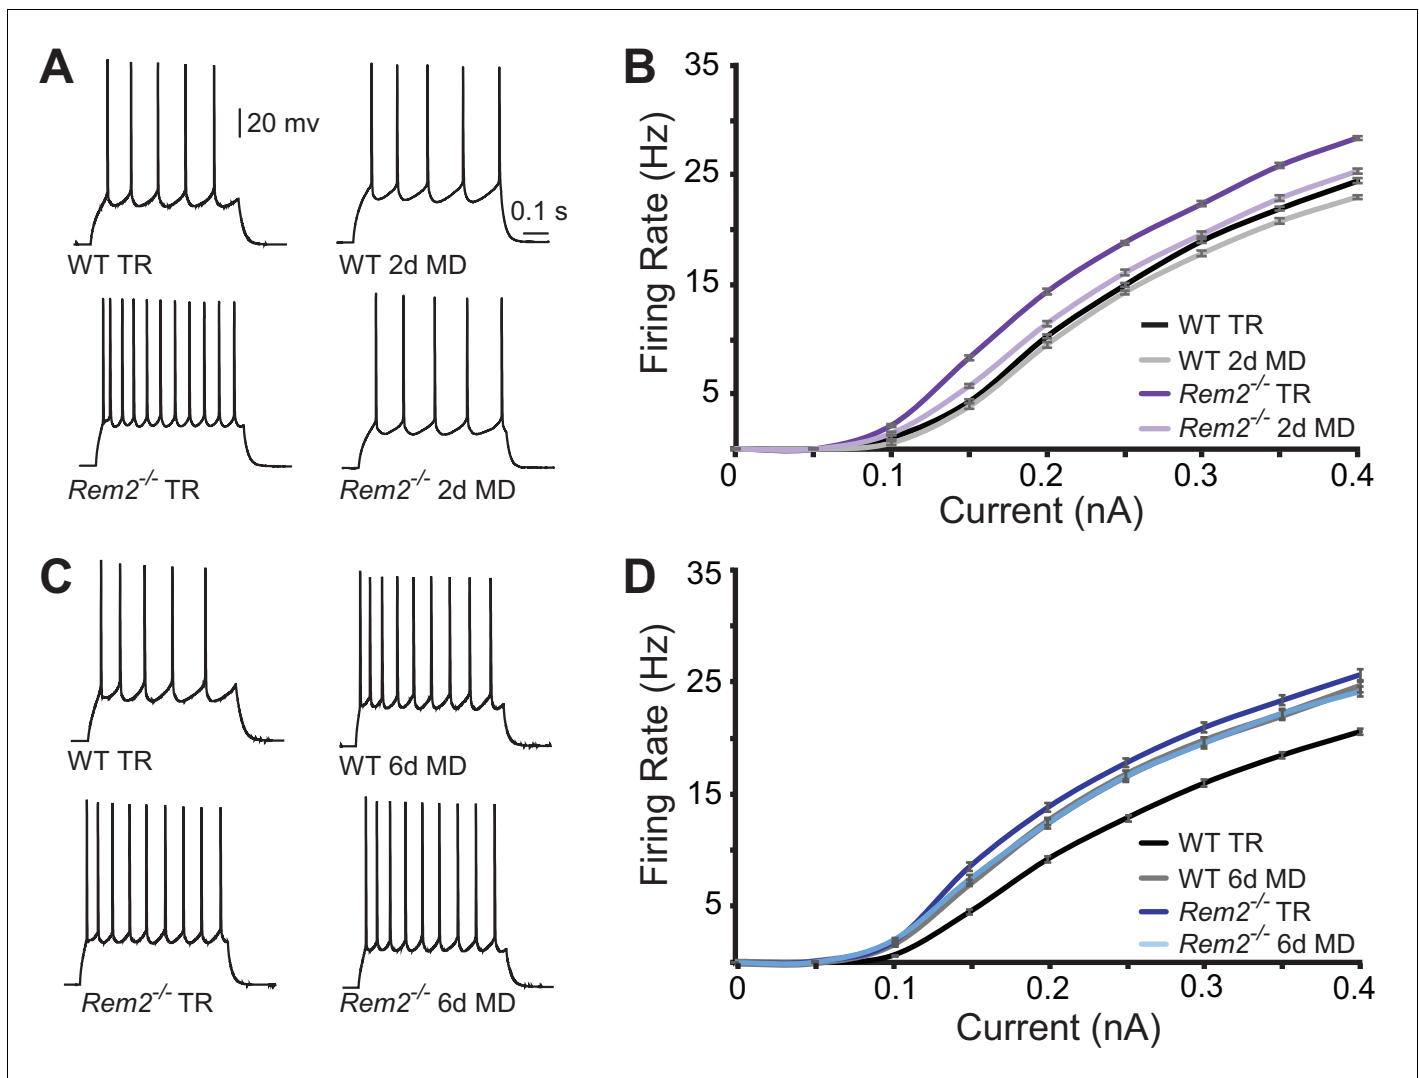

**Figure 7.** *Rem2* alters the intrinsic excitability of layer 2/3 pyramidal neurons. (A) Example traces of evoked action potential responses (0.2 nA current injected) of neurons from WT or *Rem2*<sup>-/-</sup> mice either typically reared (TR) to P28 or monocularly deprived for 2 days from P26-P28 (2d MD). (B) Average *f-I* curves for WT TR (black line, *n* = 25), WT 2d MD (gray line, *n* = 22), *Rem2*<sup>-/-</sup> TR (dark purple line, *n* = 23) and *Rem2*<sup>-/-</sup> 2d MD (light purple line, *n* = 22) in response to normal visual experience or 2 days of monocular deprivation. *N* = 4 animals per experimental condition. (C) Examples of evoked responses from neurons of WT or *Rem2*<sup>-/-</sup> following at P32 that were either typically reared (WT TR and *Rem2*<sup>-/-</sup> TR) or monocularly deprived for 6 days from P26-P32 (WT 6d MD and *Rem2*<sup>-/-</sup> 6d MD). (D) Average *f-I* curves for WT TR (black line, *n* = 32), WT 6d MD (gray line, *n* = 22), *Rem2*<sup>-/-</sup> TR (dark blue line, *n* = 24) and *Rem2*<sup>-/-</sup> 6d MD (light blue line, *n* = 22) in response to normal visual experience or after 6 days of monocular deprivation. *N* = 5 mice for WT TR and 4 mice for all other conditions.

DOI: <https://doi.org/10.7554/eLife.33092.012>

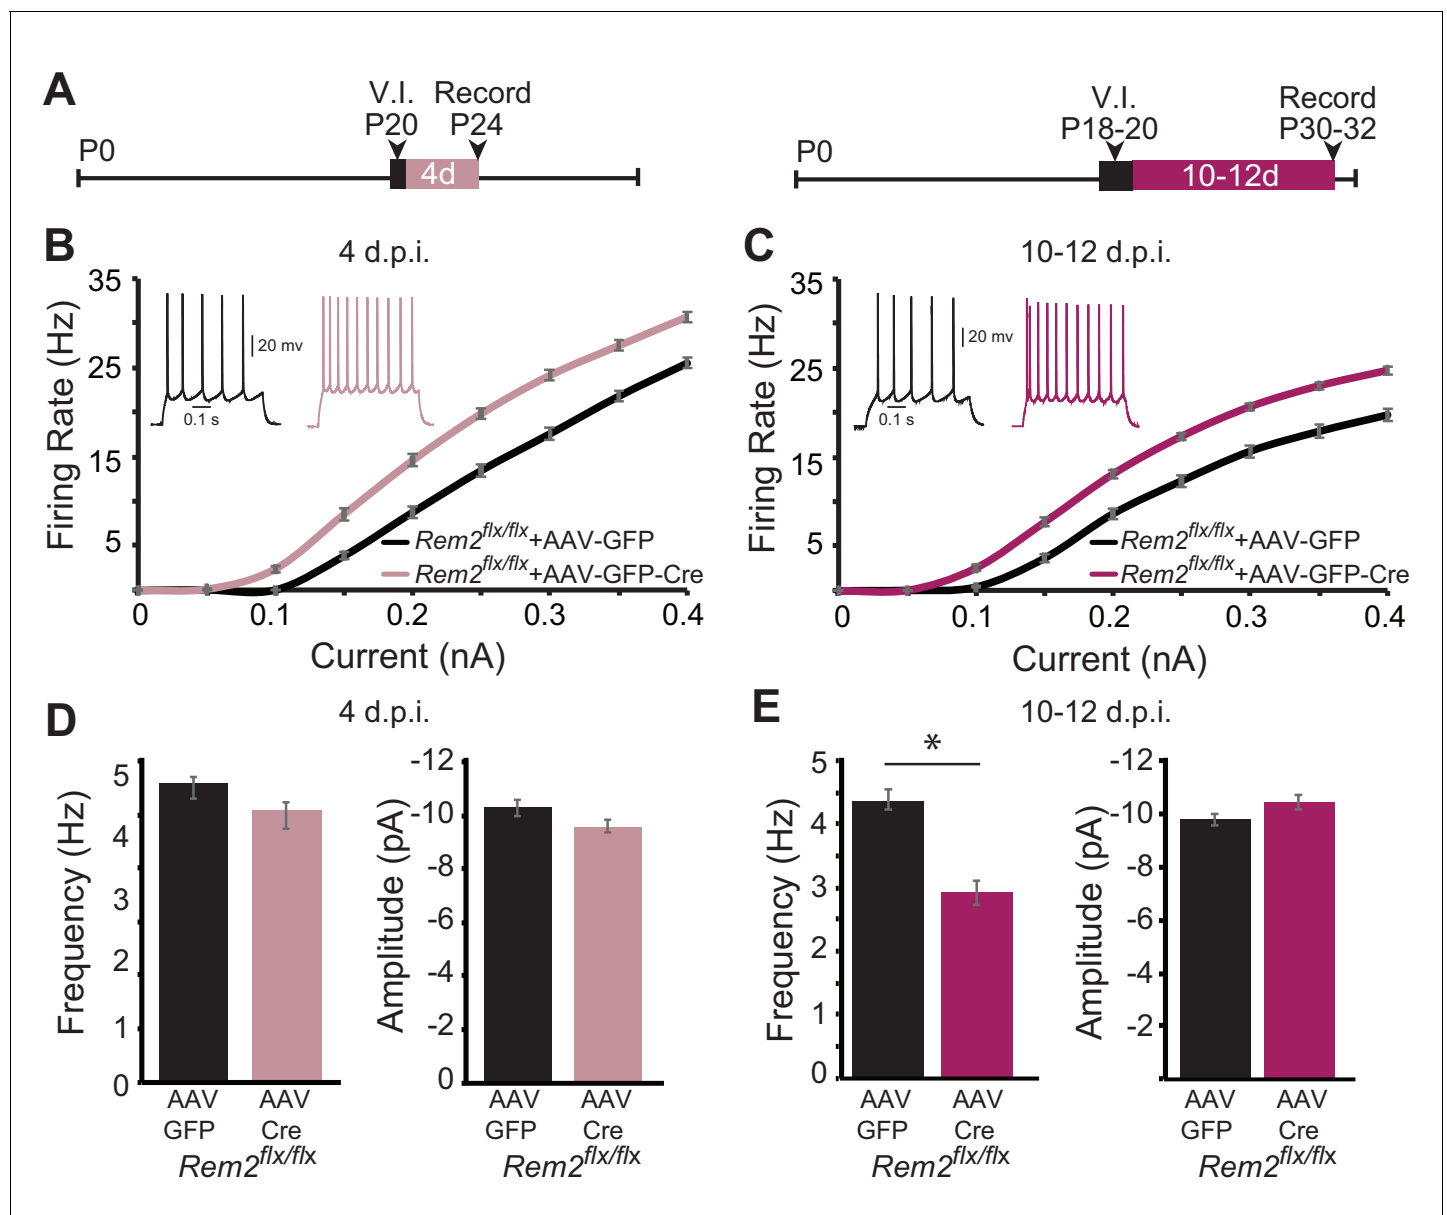

**Figure 8.** *Rem2* cell-autonomously regulates intrinsic excitability in vivo. (A) Experimental timeline of acute, viral-mediated *Rem2* deletion in *Rem2*<sup>flx/flx</sup> mice. V.I., virus injection. (B) Average *f-I* curves recorded from neurons of *Rem2*<sup>flx/flx</sup> mice injected with either a control GFP (*Rem2*<sup>flx/flx</sup> + AAV GFP, black, *n* = 17) or GFP-Cre expressing virus (*Rem2*<sup>flx/flx</sup> + AAV GFP-Cre, mauve, *n* = 19) measured 4 days post infection (d.p.i.). Inset: representative traces of evoked responses measured at 0.2 nA from *Rem2*<sup>flx/flx</sup> + AAV GFP and *Rem2*<sup>flx/flx</sup> + AAV GFP-Cre neurons 4 d.p.i. (C) Average *f-I* curves recorded from neurons of *Rem2*<sup>flx/flx</sup> + AAV GFP (black, *n* = 18) or *Rem2*<sup>flx/flx</sup> + AAV GFP-Cre (magenta, *n* = 20) measured 10–12 days post infection. Inset: representative traces of evoked responses measured at 0.2 nA from *Rem2*<sup>flx/flx</sup> + AAV GFP and *Rem2*<sup>flx/flx</sup> + AAV GFP-Cre neurons 10–12 d.p.i. (D) Average mEPSC (left) frequency and (right) amplitude measured in *Rem2*<sup>flx/flx</sup> + AAV GFP (black, *n* = 14) or *Rem2*<sup>flx/flx</sup> + AAV GFP-Cre (mauve, *n* = 17) measured 4 days post infection. (E) Average mEPSC (left) frequency and (right) amplitude measured in *Rem2*<sup>flx/flx</sup> + AAV GFP (black, *n* = 22) or *Rem2*<sup>flx/flx</sup> + AAV GFP-Cre (magenta, *n* = 18) measured 10–12 days post infection. *N* = 3–5 animals per condition. Data is presented as mean ± SEM. \**p* < 0.05, by two-way ANOVA and Tukey post-hoc for mEPSC frequency and amplitude mean data plots.

DOI: <https://doi.org/10.7554/eLife.33092.014>

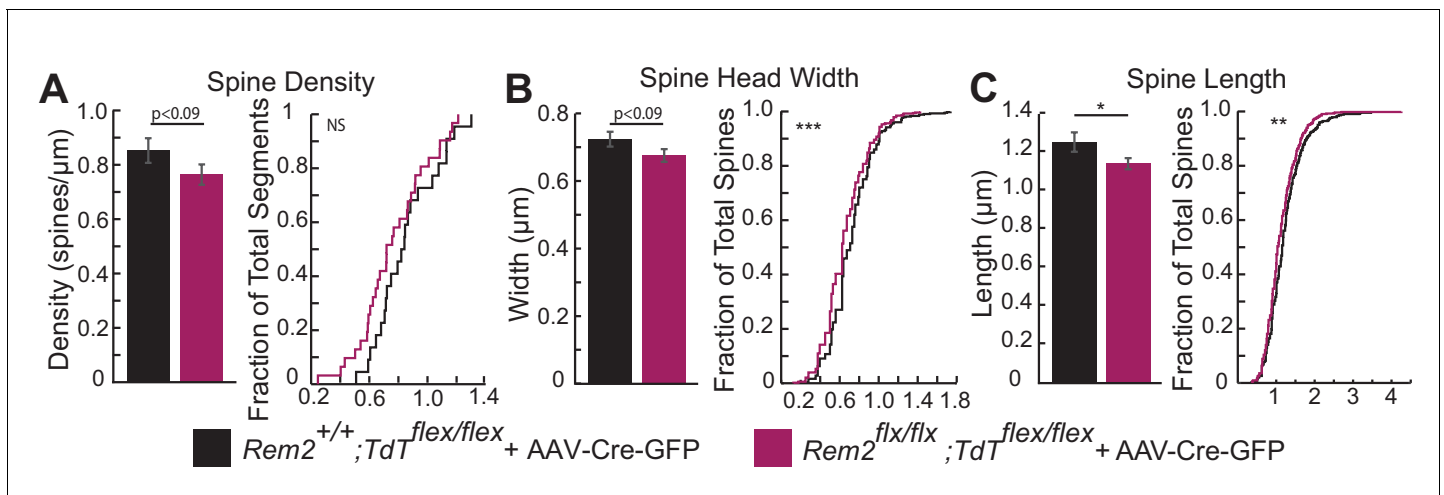

**Figure 8—figure supplement 1.** Brief loss of Rem2 results in a modest decrease in spine density and spine remodeling. (A) Average spine density (left) and cumulative histogram of spine densities (right) for control  $Rem2^{+/+};Tdt^{flex/flex}$  (black,  $n = 22$ ) or  $Rem2^{flx/flx};Tdt^{flex/flex}$  (orange,  $n = 31$ ) GFP-Cre expressing neurons at 11 days post injection (d.p.i.). GFP-Cre expressing neurons from  $Rem2^{flx/flx};Tdt^{flex/flex}$  animals show a trend toward decreased mean spine density compared to control  $Rem2^{+/+};Tdt^{flex/flex}$  neurons ( $p=0.09$ , two sample t-test) and a shift in the population of spine densities toward lower values. (B) Average spine head width (left) and cumulative histogram (right) of spine head measurements from control  $Rem2^{+/+};Tdt^{flex/flex}$  (black,  $n = 22$ ) or  $Rem2^{flx/flx};Tdt^{flex/flex}$  (orange,  $n = 31$ ) GFP-Cre expressing neurons at 11d.p.i. GFP-Cre expressing neurons from  $Rem2^{flx/flx};Tdt^{flex/flex}$  mice show a trend toward decreased mean spine head width compared to control  $Rem2^{+/+};Tdt^{flex/flex}$  neurons ( $p=0.09$ , two sample t-test) and a highly significant shift in the distribution of spine head widths toward narrower spine heads ( $p<0.001$ , Kolmogorov-Smirnov test). (C) Average spine neck length (left) and cumulative histogram (right) of spine neck measurements from control  $Rem2^{+/+};Tdt^{flex/flex}$  (black,  $n = 22$ ) or  $Rem2^{flx/flx};Tdt^{flex/flex}$  mice (orange,  $n = 31$ ) GFP-Cre expressing neurons at 11d.p.i. GFP-Cre expressing neurons from  $Rem2^{flx/flx};Tdt^{flex/flex}$  mice show decreased mean spine neck length compared to control  $Rem2^{+/+};Tdt^{flex/flex}$  ( $p<0.05$ , 2 sample t-test) and a highly significant shift in the distribution of spine head widths toward narrower spine heads ( $p<0.01$ , Kolmogorov-Smirnov test).  $N = 5$  animals per condition. Data is presented as mean  $\pm$  SEM (left) and as cumulative distribution plots (right).

DOI: <https://doi.org/10.7554/eLife.33092.015>

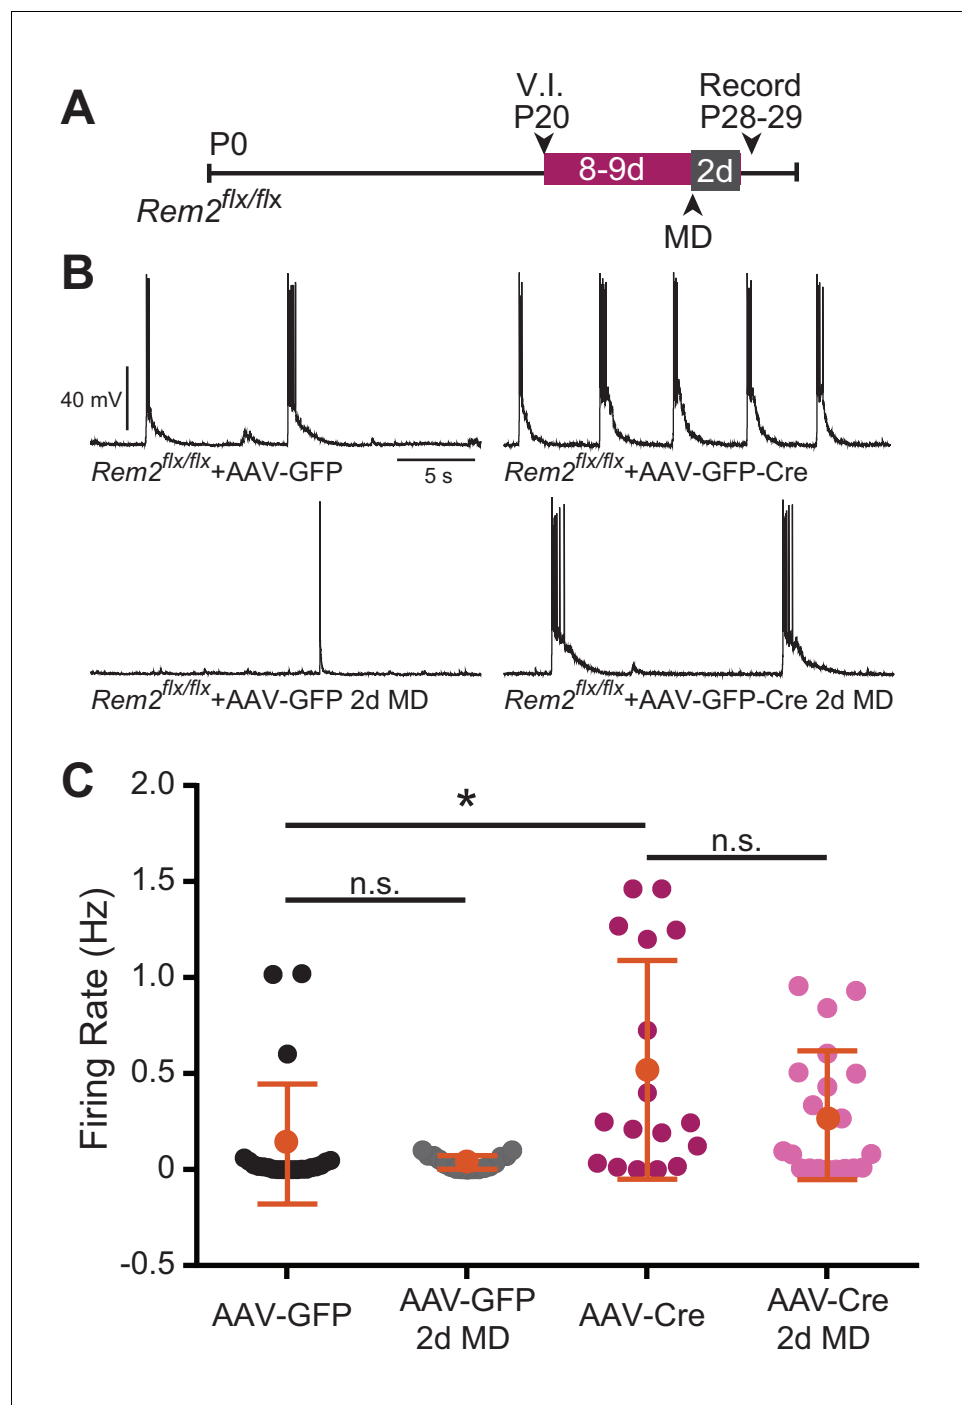

**Figure 9.** Spontaneous firing rate is regulated by Rem2 in vitro. (A) Experimental timeline of acute, viral-mediated *Rem2* deletion in *Rem2*<sup>flx/flx</sup> mice with 2 days monocular deprivation (MD). V.I., virus injection. (B) Examples of spontaneous firing recorded in GFP<sup>+</sup> layer 2/3 pyramidal neurons in *Rem2*<sup>flx/flx</sup> + AAV GFP (top left, n = 22), *Rem2*<sup>flx/flx</sup> + AAV GFP+2 d MD (bottom left, n = 17), *Rem2*<sup>flx/flx</sup> + AAV GFP-Cre (top right, n = 17), and *Rem2*<sup>flx/flx</sup> + AAV GFP-Cre+2 d MD (bottom right, n = 20). (C) Average firing rate measured in layer 2/3 pyramidal neurons. Data is presented as individual data points, with the horizontal bar denoting average. N = 4 animals per condition. Error bars represent S.E.M. \*p<0.05, by two-way ANOVA with Tukey post-hoc.

DOI: <https://doi.org/10.7554/eLife.33092.016>

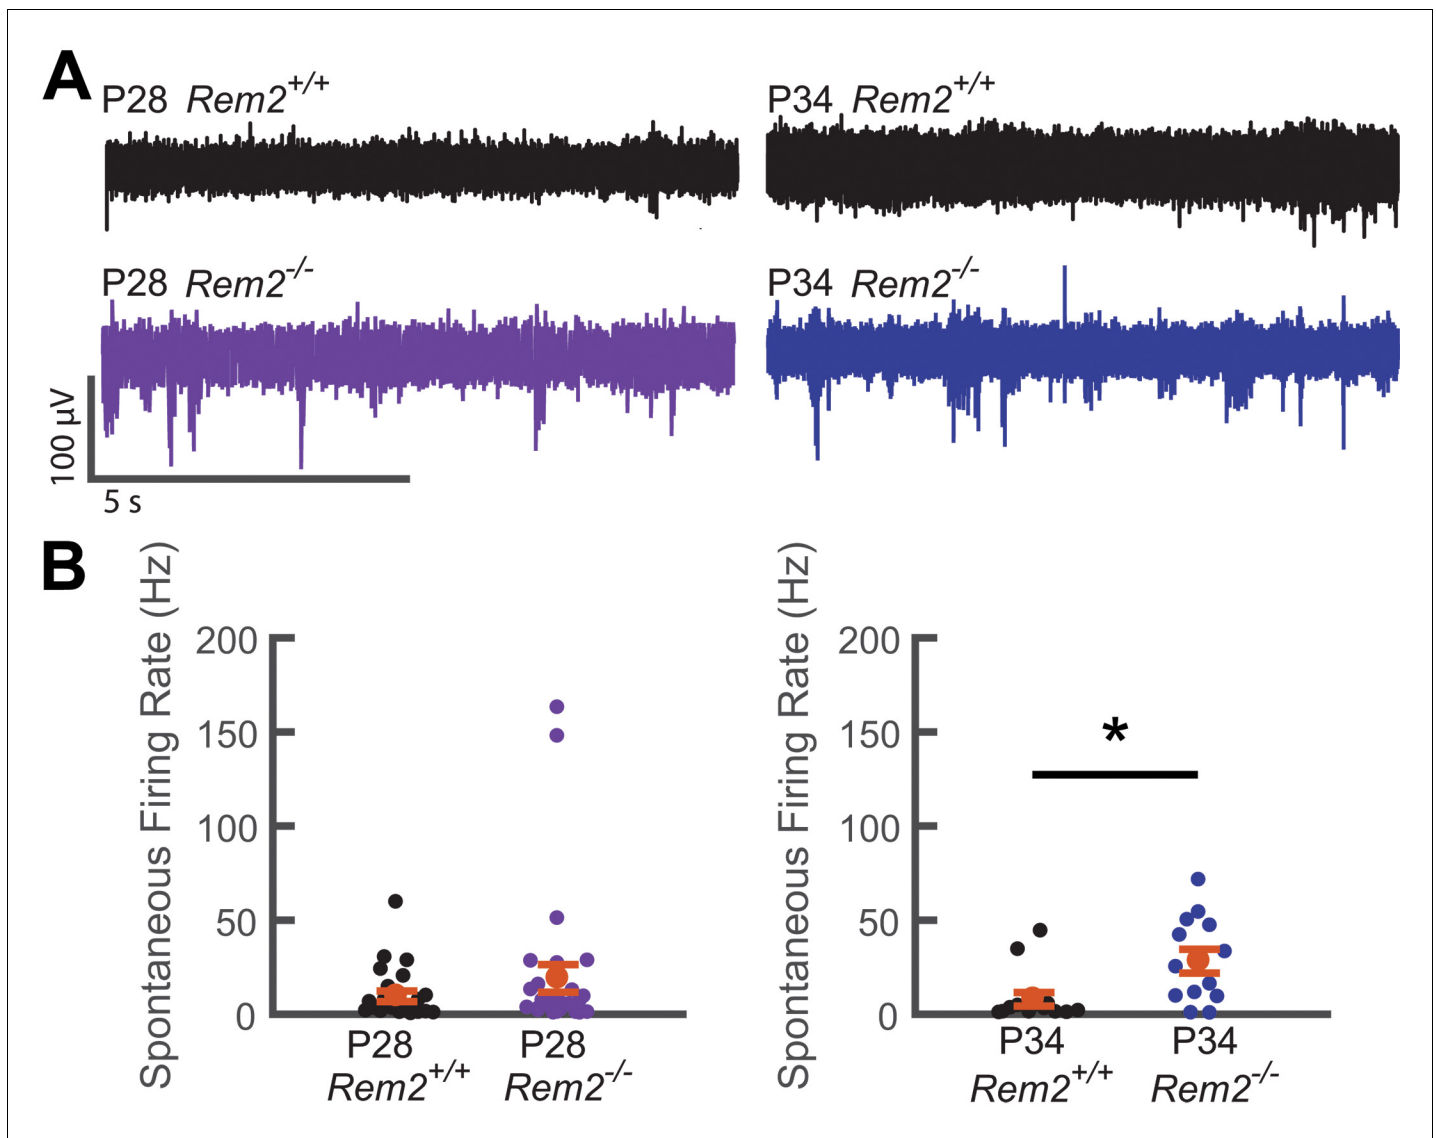

**Figure 10.** Spontaneous firing rate is regulated by Rem2 in vivo. **A)** Representative extracellular multi-unit voltage traces from L2/3 neurons in binocular visual cortex (V1b) of wildtype (top) and *Rem2*<sup>-/-</sup> (bottom) typically reared mice sampled during the peak (P28, left) and late (P34, right) visual critical period. **(B)** Average spontaneous multiunit firing rate of L2/3 V1b neurons sampled from anesthetized wildtype and *Rem2*<sup>-/-</sup> mice during the peak (Right, P28 WT, black, n = 24 sites recorded from 4 mice; P28 *Rem2*<sup>-/-</sup>, purple, n = 29 sites recorded from 5 mice) and late (Left, P34 WT, black, n = 14 sites sampled from 3 mice; P34 *Rem2*<sup>-/-</sup>, blue, n = 13 sites sampled from 3 mice) visual critical period. Each small circle represents one recording site. Orange circles and error bars are mean  $\pm$  SEM. \*p < 0.0153 by Kruskal-Wallis test.

DOI: <https://doi.org/10.7554/eLife.33092.017>
